# Supplementary material
Source: publisher figshare collection journal article supplement (https://geolsoc.figshare.com/articles/dataset/_/3453215)
Supplement: Supplementary file 1 [file 1]

PYROXENES

|    | <u>Date</u> | <u>Comment</u> | <u>SiO2</u> | <u>TiO2</u> | <u>Al2O3</u> | <u>Cr2O3</u> | <u>FeO</u> |
|----|-------------|----------------|-------------|-------------|--------------|--------------|------------|
| 1  | 27/02/2012  | 4.2 Px 1       | 51.8514     | 0.3321      | 1.5228       | -0.0034      | 10.9541    |
| 2  | 27/02/2012  | 4.2 Px 2       | 52.4332     | 0.2384      | 1.4013       | -0.0106      | 10.1336    |
| 3  | 27/02/2012  | 4.2 Px 5       | 52.0426     | 0.2704      | 0.9          | -0.0068      | 12.8756    |
| 4  | 27/02/2012  | 4.2 Px 6       | 51.7587     | 0.3522      | 1.6005       | -0.0067      | 11.1439    |
| 5  | 27/02/2012  | 4.2 Px 7       | 51.9663     | 0.3195      | 1.5665       | -0.0007      | 11.0065    |
| 6  | 27/02/2012  | 4.2 Px 9       | 51.8202     | 0.3674      | 1.3707       | -0.0075      | 11.7965    |
| 7  | 27/02/2012  | 4.2 Px 10      | 52.8199     | 0.2148      | 1.6694       | 0.0231       | 5.5333     |
| 8  | 27/02/2012  | 4.2 Px 11      | 51.2191     | 0.2997      | 1.3929       | 0.0036       | 11.1186    |
| 9  | 26/02/2012  | 18.5 Px 2      | 51.4877     | 0.4876      | 1.8916       | 0.0017       | 12.1991    |
| 10 | 26/02/2012  | 18.5 Px 3      | 51.9766     | 0.3336      | 1.3344       | -0.0051      | 11.5381    |
| 11 | 26/02/2012  | 18.5 Px 4      | 50.8329     | 0.4434      | 2.495        | -0.0031      | 11.8637    |
| 12 | 26/02/2012  | 18.5 Px 5      | 51.4192     | 0.4204      | 1.6755       | 0.0009       | 12.3563    |
| 13 | 26/02/2012  | 18.5 Px 6      | 51.6861     | 0.387       | 1.4864       | 0.0049       | 11.6322    |
| 14 | 26/02/2012  | 18.5 Px 7      | 51.318      | 0.4018      | 1.4983       | -0.0003      | 13.0686    |
| 15 | 26/02/2012  | 18.5 Px 8      | 51.4102     | 0.3741      | 2.2396       | 0.0255       | 10.811     |
| 16 | 26/02/2012  | 18.5 Px 9      | 51.332      | 0.4117      | 2.0309       | 0.0046       | 11.3323    |
| 17 | 26/02/2012  | 18.5 Px 10     | 51.3256     | 0.3633      | 2.2686       | 0.0101       | 10.3153    |
| 18 | 26/02/2012  | 18.5 Px 11     | 51.4011     | 0.4359      | 1.6946       | 0.0078       | 12.5793    |
| 19 | 27/02/2012  | 19.1 Px 5      | 51.583      | 0.4199      | 1.5827       | 0.0062       | 12.3183    |
| 20 | 27/02/2012  | 19.1 Px 6      | 52.0597     | 0.3579      | 1.6879       | 0.0011       | 10.9494    |
| 21 | 27/02/2012  | 19.1 Px 9      | 51.6586     | 0.626       | 2.3363       | 0.0089       | 11.9584    |
| 22 | 27/02/2012  | 19.1 Px 10     | 51.9353     | 0.3657      | 1.5069       | -0.0025      | 10.9325    |
| 23 | 27/02/2012  | 19.1 Px 11     | 51.7913     | 0.3448      | 1.6208       | 0.0035       | 10.8129    |
| 24 | 26/02/2012  | 21.1 Px 3      | 51.3015     | 0.2938      | 2.3134       | 0.0383       | 9.5741     |
| 25 | 26/02/2012  | 21.1 Px 5      | 51.4934     | 0.3641      | 2.0367       | -0.0049      | 10.9853    |
| 26 | 26/02/2012  | 21.1 Px 6      | 50.9796     | 0.4051      | 2.3949       | 0.0615       | 10.5808    |
| 27 | 26/02/2012  | 21.1 Px 7      | 51.3355     | 0.4166      | 1.6192       | 0.0076       | 11.8223    |
| 28 | 26/02/2012  | 21.1 Px 8      | 51.6952     | 0.4044      | 1.5666       | 0.0069       | 11.8135    |
| 29 | 26/02/2012  | 21.1 Px 9      | 51.9916     | 0.4059      | 1.5294       | 0.0065       | 12.2005    |
| 30 | 26/02/2012  | 21.1 Px 10     | 53.3249     | 0.0954      | 1.2115       | 0.7989       | 3.5808     |
| 31 | 26/02/2012  | 21.1 Px 11     | 51.0468     | 0.4651      | 1.715        | -0.0078      | 12.6893    |
| 32 | 26/02/2012  | 21.2 Px 1      | 51.6546     | 0.3602      | 1.4281       | -0.0053      | 11.804     |
| 33 | 26/02/2012  | 21.2 Px 2      | 52.2741     | 0.3772      | 1.3975       | 0.0005       | 11.1588    |
| 34 | 26/02/2012  | 21.2 Px 3      | 51.3737     | 0.4048      | 1.906        | 0.0104       | 11.2368    |
| 35 | 26/02/2012  | 21.2 Px 4      | 50.9865     | 0.5359      | 2.2299       | 0.0015       | 12.1251    |
| 36 | 27/02/2012  | 23A.1 Px 1     | 51.5419     | 0.495       | 2.0402       | 0.0476       | 10.8326    |
| 37 | 27/02/2012  | 23A.1 Px 2     | 51.3241     | 0.4291      | 2.0692       | 0.0017       | 12.1752    |
| 38 | 27/02/2012  | 23A.1 Px 3     | 52.1562     | 0.356       | 1.5148       | 0.0236       | 10.8846    |
| 39 | 27/02/2012  | 23A.1 Px 4     | 51.9164     | 0.3479      | 2.0145       | 0.0854       | 10.4278    |
| 40 | 27/02/2012  | 23A.1 Px 5     | 52.6328     | 0.2869      | 1.2739       | -0.0014      | 9.9507     |
| 41 | 27/02/2012  | 23A.1 Px 6     | 51.3383     | 0.3646      | 1.3638       | -0.0023      | 13.9772    |
| 42 | 27/02/2012  | 23A.1 Px 7     | 50.9828     | 0.5134      | 3.2588       | 0.0673       | 10.1879    |

| <u>MnO</u> | <u>MgO</u> | <u>CaO</u> | <u>Na2O</u> | <u>K2O</u> | <u>Total</u> | <u>NiO</u> |
|------------|------------|------------|-------------|------------|--------------|------------|
| 0.4214     | 14.1191    | 20.4996    | 0.2458      | -0.0052    | 99.9372      | -0.0004    |
| 0.5031     | 13.9867    | 21.2152    | 0.3113      | 0.0161     | 100.2296     | 0.0014     |
| 0.7805     | 12.9408    | 20.155     | 0.243       | 0.0073     | 100.2123     | 0.0039     |
| 0.4225     | 14.0532    | 20.5868    | 0.2456      | -0.0084    | 100.1628     | 0.0145     |
| 0.4166     | 14.2364    | 20.4072    | 0.252       | 0.0037     | 100.1704     | -0.0037    |
| 0.3782     | 14.0259    | 19.8034    | 0.2484      | 0.008      | 99.8152      | 0.004      |
| 0.1515     | 16.2238    | 23.1209    | 0.1771      | -0.0028    | 99.9414      | 0.0104     |
| 0.4022     | 14.0956    | 20.4657    | 0.285       | -0.0066    | 99.2799      | 0.0042     |
| 0.4387     | 14.0458    | 19.2384    | 0.2424      | 0.0015     | 100.0417     | 0.0072     |
| 0.5136     | 13.798     | 20.1898    | 0.2487      | 0.0203     | 99.9317      | -0.0165    |
| 0.4843     | 12.9794    | 20.485     | 0.2689      | 0.0168     | 99.8759      | 0.0096     |
| 0.42       | 14.0996    | 19.3524    | 0.2482      | -0.0081    | 99.993       | 0.0086     |
| 0.401      | 13.6489    | 20.4051    | 0.2643      | -0.0023    | 99.9126      | -0.0009    |
| 0.4525     | 13.5549    | 19.2122    | 0.2511      | -0.0058    | 99.7528      | 0.0013     |
| 0.3332     | 15.2567    | 19.2251    | 0.2018      | 0.0017     | 99.9012      | 0.0224     |
| 0.4055     | 13.8352    | 20.3389    | 0.2903      | 0.0039     | 99.9725      | -0.0128    |
| 0.3092     | 14.6176    | 20.3862    | 0.1986      | 0.0071     | 99.8073      | 0.0057     |
| 0.446      | 13.5838    | 19.5785    | 0.2524      | -0.0023    | 99.9747      | -0.0024    |
| 0.4332     | 13.5408    | 19.9154    | 0.2615      | 0.0065     | 100.0656     | -0.0018    |
| 0.4094     | 14.0004    | 20.4591    | 0.2729      | 0.0005     | 100.1958     | -0.0023    |
| 0.4077     | 16.8602    | 16.4231    | 0.2018      | 0.0158     | 100.5076     | 0.0109     |
| 0.4626     | 13.9091    | 20.9108    | 0.3114      | 0.007      | 100.3427     | 0.0041     |
| 0.4645     | 13.9901    | 20.6805    | 0.2698      | -0.0088    | 99.9721      | 0.0026     |
| 0.2667     | 15.3581    | 20.2217    | 0.2119      | 0.0115     | 99.5859      | -0.0049    |
| 0.3265     | 14.7297    | 19.6335    | 0.2025      | 0.0037     | 99.7775      | 0.007      |
| 0.3167     | 14.7144    | 19.6073    | 0.2565      | 0.0042     | 99.3295      | 0.0086     |
| 0.4745     | 14.0266    | 19.7723    | 0.2465      | -0.0093    | 99.7153      | 0.0034     |
| 0.4088     | 13.984     | 20.1686    | 0.2468      | 0.0133     | 100.3122     | 0.004      |
| 0.4228     | 13.658     | 19.9617    | 0.2226      | 0.0001     | 100.4145     | 0.0152     |
| 0.1076     | 18.4598    | 22.1072    | 0.1192      | -0.0042    | 99.8189      | 0.0178     |
| 0.4438     | 13.7268    | 19.1668    | 0.2546      | -0.0046    | 99.5077      | 0.012      |
| 0.4931     | 13.8681    | 20.4758    | 0.2388      | -0.0084    | 100.3128     | 0.0038     |
| 0.4108     | 13.9758    | 20.4037    | 0.2675      | -0.0014    | 100.2744     | 0.0099     |
| 0.3725     | 14.2832    | 19.9229    | 0.2604      | -0.0089    | 99.7714      | 0.0097     |
| 0.3934     | 13.7131    | 19.6979    | 0.2522      | 0.0056     | 99.9384      | -0.0027    |
| 0.4293     | 13.711     | 20.8082    | 0.3105      | 0.0141     | 100.2513     | 0.0209     |
| 0.3686     | 13.6859    | 19.5196    | 0.2751      | -0.0026    | 99.8533      | 0.0076     |
| 0.4493     | 13.989     | 20.7961    | 0.2551      | 0.0055     | 100.4425     | 0.0125     |
| 0.3356     | 16.3696    | 18.0048    | 0.1603      | 0.0102     | 99.6801      | 0.0076     |
| 0.4871     | 14.3444    | 21.0819    | 0.2741      | -0.0114    | 100.3316     | 0.0127     |
| 0.6369     | 13.2483    | 18.8254    | 0.2047      | 0.0114     | 99.967       | -0.0013    |
| 0.3249     | 15.3149    | 18.9482    | 0.2483      | -0.008     | 99.8459      | 0.0074     |
