# Supplementary material
Source: publisher figshare collection journal article supplement (https://geolsoc.figshare.com/articles/dataset/_/3453215)
Supplement: Supplementary file 2 [file 1]

| Comment | 18.5 Plag 1 | 18.5 Plag 2 | 18.5 Plag 3 | 18.5 Plag 4 | 18.5 Plag 5 | 18.5 Plag 7 | 18.5 Plag 8 |
|---------|-------------|-------------|-------------|-------------|-------------|-------------|-------------|
| Na2O    | 3.316       | 2.8978      | 2.4362      | 6.6659      | 0.7444      | 6.6331      | 2.0265      |
| Al2O3   | 30.5879     | 31.1796     | 31.7223     | 26.3885     | 35.0887     | 26.2842     | 32.2557     |
| SiO2    | 50.7143     | 49.4406     | 48.632      | 57.7382     | 44.3351     | 57.3795     | 47.0762     |
| CaO     | 14.558      | 15.302      | 16.0067     | 8.7708      | 18.9749     | 8.7727      | 16.6439     |
| K2O     | 0.0603      | 0.0607      | 0.0487      | 0.198       | 0.0054      | 0.2065      | 0.0268      |
| SrO     | 0.0304      | 0.0352      | 0.0508      | 0.0361      | 0.03        | 0.0447      | 0.0273      |
| TiO2    | 0.0226      | 0.0293      | 0.0221      | 0.0018      | 0.0081      | 0.0066      | 0.0092      |
| MnO     | -0.0136     | 0.0119      | -0.0025     | 0.0324      | 0.0058      | -0.0068     | 0.0054      |
| MgO     | 0.0669      | 0.075       | 0.1279      | 0.0156      | 0.007       | 0.0129      | 0.1033      |
| FeO     | 0.7392      | 0.7365      | 0.7596      | 0.264       | 0.4744      | 0.2718      | 0.7108      |
| Total   | 100.0819    | 99.7686     | 99.8039     | 100.1114    | 99.6736     | 99.6054     | 98.8851     |

| Comment | 18.5 Plag 9 | 18.5 Plag 10 | 18.5 Plag 11 | 18.5 Plag 12 | 18.5 Plag 13 | 23A.1 Plag 14 | 23A.1 Plag 15 |
|---------|-------------|--------------|--------------|--------------|--------------|---------------|---------------|
| Na2O    | 2.335       | 3.5706       | 3.2727       | 1.9805       | 1.0758       | 6.8233        | 1.8772        |
| Al2O3   | 32.4269     | 30.4817      | 31.0896      | 32.4459      | 34.6528      | 26.7787       | 33.094        |
| SiO2    | 48.0372     | 51.0004      | 50.2565      | 47.4187      | 45.0432      | 58.1097       | 46.9302       |
| CaO     | 16.088      | 14.0771      | 14.8428      | 16.6136      | 18.5149      | 8.6117        | 17.1635       |
| K2O     | 0.0439      | 0.0846       | 0.0628       | 0.0312       | 0.0143       | 0.1613        | 0.0888        |
| SrO     | 0.0292      | 0.0351       | 0.048        | 0.0403       | 0.0287       | 0.0658        | 0.0841        |
| TiO2    | 0.0174      | 0.0196       | 0.0271       | 0.0168       | 0.014        | 0.0048        | 0.0214        |
| MnO     | -0.0128     | -0.0037      | 0.0176       | 0.0025       | 0.0344       | 0.0228        | 0.007         |
| MgO     | 0.0538      | 0.0598       | 0.0628       | 0.0509       | 0.028        | 0.0111        | 0.0836        |
| FeO     | 0.6809      | 0.6601       | 0.6876       | 0.6843       | 0.5739       | 0.2798        | 0.8136        |
| Total   | 99.6993     | 99.9853      | 100.3676     | 99.2846      | 99.9799      | 100.8691      | 100.1634      |

| Comment | 23A.1 Plag 16 | 23A.1 Plag 17 | 23A.1 Plag 18 | 23A.1 Plag 19 | 23A.1 Plag 20 | 23A.1 Plag 21 | 23A.1 Plag 22 |
|---------|---------------|---------------|---------------|---------------|---------------|---------------|---------------|
| Na2O    | 6.5385        | 1.2239        | 2.7974        | 0.9696        | 3.3197        | 4.0068        | 1.3179        |
| Al2O3   | 27.0024       | 34.0777       | 31.8109       | 34.6498       | 30.5713       | 30.3385       | 34.0231       |
| SiO2    | 58.2862       | 45.7826       | 49.3479       | 45.4411       | 50.2613       | 51.6431       | 45.8019       |
| CaO     | 9.004         | 17.9633       | 15.5962       | 18.7912       | 14.4016       | 13.1362       | 17.9883       |
| K2O     | 0.1599        | 0.0364        | 0.0615        | 0.0267        | 0.0963        | 0.0797        | 0.074         |
| SrO     | 0.0533        | 0.0657        | 0.0622        | 0.0473        | 0.0644        | 0.0436        | 0.0895        |
| TiO2    | 0.0075        | 0.0132        | 0.0223        | 0.0111        | 0.0322        | 0.0134        | 0.0196        |
| MnO     | -0.01         | 0.0223        | -0.0062       | 0.0055        | 0.0345        | -0.0176       | 0.024         |
| MgO     | 0.0172        | 0.0861        | 0.0798        | 0.0667        | 0.0832        | 0.031         | 0.0665        |
| FeO     | 0.291         | 0.6456        | 0.8291        | 0.6542        | 0.735         | 0.4774        | 0.7346        |
| Total   | 101.35        | 99.9169       | 100.6012      | 100.6632      | 99.5994       | 99.7521       | 100.1393      |

| Comment | 23A.1 Plag 23 | 23A.1 Plag 24 | 19.1 Plag 25 | 19.1 Plag 26 | 19.1 Plag 27 | 19.1 Plag 28 | 19.1 Plag 29 |
|---------|---------------|---------------|--------------|--------------|--------------|--------------|--------------|
| Na2O    | 5.9884        | 6.4271        | 6.3127       | 3.3401       | 5.5778       | 2.5582       | 2.9695       |
| Al2O3   | 27.6943       | 26.8282       | 27.0067      | 31.2906      | 27.7146      | 32.4879      | 31.5655      |
| SiO2    | 56.2246       | 57.599        | 57.2444      | 50.2397      | 55.8115      | 48.8406      | 49.8402      |
| CaO     | 10.1251       | 9.2248        | 9.132        | 14.5701      | 10.592       | 15.6463      | 15.2207      |
| K2O     | 0.128         | 0.2041        | 0.5355       | 0.0631       | 0.1668       | 0.0583       | 0.0731       |
| SrO     | 0.0689        | 0.0386        | 0.095        | 0.0712       | 0.0586       | 0.046        | 0.0473       |
| TiO2    | 0.0053        | 0.0116        | 0.0068       | 0.0226       | 0.0328       | 0.0097       | 0.0322       |
| MnO     | 0.0221        | -0.0045       | 0.0157       | 0.0268       | -0.0146      | 0.0125       | -0.003       |
| MgO     | 0.0184        | 0.021         | 0.0078       | 0.0742       | 0.0565       | 0.0363       | 0.1359       |
| FeO     | 0.3194        | 0.3497        | 0.2308       | 0.6398       | 0.5197       | 0.5478       | 0.9237       |

|       |          |          |          |          |          |          |          |
|-------|----------|----------|----------|----------|----------|----------|----------|
| Total | 100.5943 | 100.6996 | 100.5873 | 100.3383 | 100.5155 | 100.2437 | 100.8051 |
|-------|----------|----------|----------|----------|----------|----------|----------|

| Comment | 19.1 Plag 1 | 4.2 Plag 1 | 4.2 Plag 2 | 4.2 Plag 3 | 4.2 Plag 4 | 4.2 Plag 5 | 4.2 Plag 6 |
|---------|-------------|------------|------------|------------|------------|------------|------------|
| Na2O    | 1.8668      | 2.5749     | 7.0999     | 1.714      | 2.5934     | 6.1005     | 2.3327     |
| Al2O3   | 33.5889     | 31.8259    | 25.5573    | 33.4068    | 32.3063    | 26.8448    | 32.5492    |
| SiO2    | 46.9218     | 48.5858    | 58.9186    | 46.7061    | 48.999     | 56.1357    | 47.941     |
| CaO     | 17.1129     | 15.6882    | 7.6318     | 17.2835    | 15.8711    | 9.5613     | 16.3042    |
| K2O     | 0.0353      | 0.0323     | 0.7323     | 0.0762     | 0.0602     | 0.2091     | 0.0506     |
| SrO     | 0.0277      | 0.0467     | 0.0789     | 0.0955     | 0.0475     | 0.0629     | 0.0431     |
| TiO2    | 0.0148      | 0.0177     | 0.0034     | 0.0234     | 0.0105     | 0.0108     | 0.0139     |
| MnO     | -0.0012     | 0.0218     | 0.0023     | -0.0187    | 0.0081     | -0.0118    | -0.0106    |
| MgO     | 0.0316      | 0.1442     | 0.0069     | 0.0761     | 0.0447     | 0.0217     | 0.0397     |
| FeO     | 0.5706      | 0.7362     | 0.2483     | 0.7291     | 0.591      | 0.3538     | 0.6325     |
| Total   | 100.1693    | 99.6736    | 100.2796   | 100.092    | 100.5318   | 99.2888    | 99.8962    |

| Comment | 4.2 Plag 7 | 4.2 Plag 8 | 4.2 Plag 10 | 4.2 Plag 11 | 21.1 Plag 1 | 21.1 Plag 2 | 21.1 Plag 3 |
|---------|------------|------------|-------------|-------------|-------------|-------------|-------------|
| Na2O    | 7.6067     | 6.0063     | 7.6617      | 1.4432      | 2.3172      | 4.3602      | 1.8519      |
| Al2O3   | 24.8859    | 27.0609    | 24.5807     | 33.6839     | 33.0966     | 29.0139     | 32.8913     |
| SiO2    | 59.6528    | 56.5138    | 60.3239     | 45.8828     | 47.7641     | 52.886      | 46.8591     |
| CaO     | 6.8514     | 9.4798     | 6.5922      | 17.6115     | 16.3882     | 12.6384     | 17.0572     |
| K2O     | 0.7792     | 0.5684     | 0.8746      | 0.0102      | 0.0146      | 0.0793      | 0.0747      |
| SrO     | 0.0627     | 0.1019     | 0.0844      | 0.038       | 0.0434      | 0.062       | 0.0944      |
| TiO2    | 0.004      | 0.0063     | -0.0025     | 0.018       | 0.0174      | 0.0213      | 0.0228      |
| MnO     | -0.0064    | 0.0108     | 0.0121      | -0.0154     | 0.011       | 0.0092      | 0.0055      |
| MgO     | 0.0048     | 0.0097     | 0.0053      | 0.0767      | 0.0201      | 0.0566      | 0.0974      |
| FeO     | 0.2619     | 0.3353     | 0.2271      | 0.8082      | 0.4512      | 0.639       | 0.7119      |
| Total   | 100.103    | 100.0933   | 100.3596    | 99.5571     | 100.124     | 99.7659     | 99.6662     |

| Comment | 21.1 Plag 4 | 21.1 Plag 5 | 21.1 Plag 6 | 21.1 Plag 7 | 21.1 Plag 8 | 21.1 Plag 9 | 21.1 Plag 10 |
|---------|-------------|-------------|-------------|-------------|-------------|-------------|--------------|
| Na2O    | 2.734       | 3.7157      | 5.2458      | 5.6973      | 0.8132      | 5.1319      | 2.681        |
| Al2O3   | 31.6565     | 29.8696     | 28.5034     | 27.8035     | 34.6292     | 28.3846     | 31.8227      |
| SiO2    | 48.9398     | 51.5428     | 54.2117     | 55.5296     | 44.6158     | 54.4455     | 48.351       |
| CaO     | 15.6449     | 13.6623     | 11.2622     | 10.6482     | 18.8757     | 11.403      | 15.7205      |
| K2O     | 0.0665      | 0.0684      | 0.1721      | 0.0795      | 0.0079      | 0.108       | 0.1259       |
| SrO     | 0.0484      | 0.0344      | 0.0514      | 0.0376      | 0.0306      | 0.059       | 0.1058       |
| TiO2    | 0.0111      | 0.0262      | 0.0219      | 0.0061      | 0.0108      | 0.0158      | 0.0429       |
| MnO     | -0.0098     | 0.0079      | 0.0043      | -0.0024     | -0.0029     | 0.0175      | -0.0029      |
| MgO     | 0.0426      | 0.078       | 0.0483      | 0.0179      | 0.0371      | 0.0322      | 0.0756       |
| FeO     | 0.5753      | 0.8278      | 0.5007      | 0.3287      | 0.6722      | 0.4684      | 0.7202       |
| Total   | 99.7093     | 99.8331     | 100.0217    | 100.1461    | 99.6896     | 100.0658    | 99.6429      |

| Comment | 21.1 Plag 1 | 21.2 Plag 1 | 21.2 Plag 2 | 21.2 Plag 3 | 21.2 Plag 4 | 21.2 Plag 4 | 21.2 Plag 5 |
|---------|-------------|-------------|-------------|-------------|-------------|-------------|-------------|
| Na2O    | 5.9347      | 5.5498      | 1.5787      | 1.2845      | 6.7451      | 6.3045      | 2.1781      |
| Al2O3   | 27.3871     | 28.1352     | 33.5577     | 34.0161     | 26.3029     | 26.9756     | 32.8549     |
| SiO2    | 56.4913     | 55.1593     | 46.4005     | 45.4942     | 58.1024     | 56.9005     | 47.7348     |
| CaO     | 10.0507     | 10.9645     | 17.6248     | 18.0936     | 8.8291      | 9.5339      | 16.7302     |
| K2O     | 0.1293      | 0.1104      | 0.0256      | 0.0187      | 0.1839      | 0.1332      | 0.0354      |
| SrO     | 0.0473      | 0.0496      | 0.0443      | 0.0515      | 0.0434      | 0.0498      | 0.031       |
| TiO2    | 0.0077      | 0.0131      | 0.0112      | 0.0053      | 0.0069      | 0.0026      | 0.0129      |
| MnO     | 0.0135      | 0.0154      | 0.0096      | 0.0183      | -0.0034     | -0.0103     | 0.0181      |
| MgO     | 0.0189      | 0.0269      | 0.0936      | 0.0252      | 0.0166      | 0.023       | 0.0537      |
| FeO     | 0.3427      | 0.3654      | 0.7197      | 0.5896      | 0.2576      | 0.292       | 0.6959      |

|         |             |             |             |         |         |          |          |
|---------|-------------|-------------|-------------|---------|---------|----------|----------|
| Total   | 100.4233    | 100.6103    | 100.1168    | 99.6344 | 100.852 | 100.4711 | 100.4159 |
| Comment | 21.2 Plag 6 | 21.2 Plag 7 | 21.2 Plag 8 |         |         |          |          |
| Na2O    | 1.2689      | 2.988       | 3.0512      |         |         |          |          |
| Al2O3   | 34.1914     | 31.1883     | 31.1921     |         |         |          |          |
| SiO2    | 45.4024     | 49.7834     | 49.984      |         |         |          |          |
| CaO     | 18.2614     | 15.11       | 14.9728     |         |         |          |          |
| K2O     | 0.0188      | 0.0576      | 0.0427      |         |         |          |          |
| SrO     | 0.0374      | 0.0371      | 0.0314      |         |         |          |          |
| TiO2    | 0.0088      | 0.0233      | 0.02        |         |         |          |          |
| MnO     | 0.0045      | 0.0058      | 0.0127      |         |         |          |          |
| MgO     | 0.0334      | 0.0621      | 0.0579      |         |         |          |          |
| FeO     | 0.6092      | 0.6858      | 0.6117      |         |         |          |          |
| Total   | 99.8738     | 100.0565    | 100.0621    |         |         |          |          |

2

10

)
