# Supplementary material
Source: publisher figshare collection journal article supplement (https://geolsoc.figshare.com/articles/dataset/_/3453215)
Supplement: Supplementary file 3 [file 1]

| Sample No.                     | 5.1    | 5.4    | 5.6   | 6c3   | 6c6    | 10.1  | 11.1   | 14.4   | 14.3      | 14.2   | 6c7   | 6c2         |
|--------------------------------|--------|--------|-------|-------|--------|-------|--------|--------|-----------|--------|-------|-------------|
| Rock Type                      | Lavas  | Lavas  | Lavas | Lavas | Lavas  | Lavas | Lavas  | Lavas  | Perapedhi | Umber  | Umber | Radiolarite |
| SiO <sub>2</sub>               | 51.588 | 37.16  | 49.64 | 19.61 | 26.1   | 24.57 | 49.25  | 63.222 | 47.109    | 47.812 | 43.74 | 83.77       |
| Al <sub>2</sub> O <sub>3</sub> | 14.668 | 10.16  | 13.17 | 5.76  | 7.03   | 6.82  | 12.95  | 9.724  | 13.71     | 9.623  | 6.7   | 4.96        |
| Fe <sub>2</sub> O <sub>3</sub> | 7.872  | 8.91   | 9.03  | 5.71  | 8.97   | 4.87  | 9      | 2.87   | 9.143     | 13.644 | 28.23 | 3.9         |
| MgO                            | 10.855 | 8.78   | 9.95  | 2.51  | 4.13   | 3.82  | 11.37  | 2.018  | 8.418     | 4.011  | 5.13  | 1.53        |
| CaO                            | 9.984  | 18.57  | 10.04 | 34.02 | 26.26  | 29.73 | 9.12   | 11.471 | 10.858    | 4.388  | 1.22  | 0.63        |
| Na <sub>2</sub> O              | 1.025  | 0.06   | 3.67  | 0.3   | -0.04  | 0.52  | 1.6    | 1.747  | 0.196     | 0.11   | 0.4   | 0.11        |
| K <sub>2</sub> O               | 0.147  | 1.849  | 0.2   | 2.321 | 2.948  | 1.7   | 1.079  | 1.057  | 0.578     | 2.146  | 0.727 | 1.156       |
| TiO <sub>2</sub>               | 0.327  | 0.183  | 0.296 | 0.118 | 0.144  | 0.114 | 0.244  | 0.527  | 0.251     | 0.401  | 0.201 | 0.209       |
| MnO                            | 0.137  | 0.205  | 0.198 | 0.242 | 0.173  | 0.099 | 0.165  | 0.124  | 0.152     | 0.465  | 1.427 | 0.082       |
| P <sub>2</sub> O <sub>5</sub>  | 0.011  | 0.024  | 0     | 0.081 | 0.067  | 0.014 | -0.002 | 0.07   | 0.002     | 0.421  | 0.596 | 0.097       |
| LOI                            | 3.09   | 13.8   | 3.52  | 28.86 | 23.9   | 25.53 | 5.13   | 6.86   | 9.44      | 16.63  | 10.71 | 3.24        |
| Total                          | 99.70  | 99.70  | 99.71 | 99.53 | 99.68  | 97.79 | 99.91  | 99.69  | 99.86     | 99.65  | 99.08 | 99.68       |
| Zn                             | 62.8   | 95.5   | 70    | 85.3  | 119.4  | 79.2  | 76.1   | 82.3   | 160       | 487.2  | 304.7 | 50.6        |
| Cu                             | 238.4  | 54.8   | 112.3 | 80.1  | 53.3   | 107.7 | 43.8   | 124    | 87.1      | 418.6  | 283   | 43.1        |
| Ni                             | 136.3  | 347.6  | 134.9 | 135.1 | 304    | 85.2  | 202.4  | 265    | 216.9     | 330.3  | 300.3 | 65.5        |
| Cr                             | 420.6  | 1392.3 | 520.9 | 440.3 | 1099.3 | 270.8 | 609.1  | 909    | 74.3      | 52.4   | 111.7 | 28.3        |
| V                              | 250.6  | 241.8  | 281.8 | 210.7 | 166.3  | 94.6  | 247.5  | 299.2  | 243.8     | 488.7  | 346.8 | 43.6        |
| Ba                             | 9.8    | 66.9   | 41.5  | 141.7 | 121.5  | 44.1  | 36.1   | 16.4   | 114.9     | 38     | 41    | 60.3        |
| Sc                             | 45.9   | 36     | 62.1  | 28.8  | 36.1   | 27.2  | 49.1   | 56     | 21.9      | 16.9   | 19    | 9.1         |
| La                             | 0      | 0.3    | -1.5  | 5.6   | 2.5    | -0.9  | -1.1   | 0      | 77.8      | 77.2   | 76.8  | 18          |
| Ce                             | 3.3    | -0.4   | 1.2   | -1    | 2.7    | 1.6   | 0.1    | 2      | 112.8     | 30.2   | 60.2  | 33.9        |
| Nd                             | 2      | -1     | -0.1  | 2.2   |        | 0     | -0.9   | -0.4   | 76.1      | 95.3   | 73.5  | 20.1        |
| U                              | 0.1    | -0.6   | -0.4  | 0     | 0.2    | -0.1  | -0.5   | -0.9   | -0.1      | 0.5    | -1.5  | 0.2         |
| Th                             | 0.3    | -0.3   | 0.1   | -0.9  | -1.5   | 0.1   | 0.1    | 0.3    | 7         | -1.3   | -0.3  | 3           |
| Pb                             | 1.3    | 0.8    | 2     | 1.1   | 1.7    | 0.7   | 0.5    | 1.5    | 79.1      | 153.7  | 113   | 12.9        |
| Nb                             | 0.6    | 0.8    | 0.7   | 0.5   | 0.4    | 0.5   | 0.7    | 0.7    | 8.7       | 5.2    | 5.2   | 4.1         |
| Zr                             | 13.2   | 8.1    | 9     | 6.7   | 7.2    | 4.6   | 4.8    | 6.6    | 93.8      | 84     | 74.9  | 41.4        |
| Y                              | 9.9    | 6      | 9     | 9.4   | 9.1    | 8.5   | 5.2    | 8.7    | 73.1      | 95.2   | 72.3  | 17.9        |
| Sr                             | 57.6   | 121    | 201.3 | 94.3  | 87.3   | 69.8  | 227.3  | 246.2  | 129.9     | 38.6   | 37.6  | 74.1        |

|    |     |      |     |      |      |    |     |     |    |      |      |      |
|----|-----|------|-----|------|------|----|-----|-----|----|------|------|------|
| Rb | 0.9 | 19.6 | 4.2 | 20.7 | 28.4 | 24 | 9.4 | 8.5 | 77 | 24.7 | 27.6 | 39.1 |
|----|-----|------|-----|------|------|----|-----|-----|----|------|------|------|
