# Supplementary material
Source: publisher figshare collection journal article supplement (https://geolsoc.figshare.com/articles/dataset/_/3453215)
Supplement: Supplementary file 4 [file 1]

| Sample No. | 4.2 1   | 4.2 1 | 4.2 2       | 4.2 2       | 4.2 2       |
|------------|---------|-------|-------------|-------------|-------------|
| Fe Group   |         | 1     | 1           | 1           | 1           |
| Glass Type | Shard   | Shard | Shard (ves) | Shard (ves) | Shard (ves) |
| Na2O       | 3.9381  |       | 3.9512      | 3.4881      | 4.0064      |
| MgO        | 0.0474  |       | 0.0342      | 0.1164      | 0.0392      |
| Al2O3      | 11.776  |       | 11.5954     | 11.2988     | 11.7482     |
| SiO2       | 73.2937 |       | 72.5971     | 72.0637     | 72.1491     |
| K2O        | 3.5872  |       | 3.4073      | 2.8374      | 3.4618      |
| CaO        | 0.8101  |       | 0.8144      | 1.0887      | 0.7301      |
| FeO        | 0.8841  |       | 0.6472      | 0.9056      | 0.7959      |
| P2O5       | 0.0065  |       | 0.007       | 0.0038      | 0.0074      |
| TiO2       | 0.0694  |       | 0.071       | 0.1018      | 0.0734      |
| MnO        | 0.08    |       | 0.0625      | 0.0623      | 0.0752      |
| Total      | 94.4927 |       | 93.1874     | 91.9666     | 93.0866     |

| Sample No. | 4.2 4   | 18.5 C 2       | 18.5 B 2 | 19.1 2  | 19.1 2  |
|------------|---------|----------------|----------|---------|---------|
| Fe Group   |         | 3              | 2        | 2       | 1       |
| Glass Type | Other   | Microlite-Perl | Pumice   | Shard   | Shard   |
| Na2O       | 2.2012  |                | 3.5779   | 3.4531  | 3.5227  |
| MgO        | 0.3604  |                | 0.1921   | 0.2486  | 0.0407  |
| Al2O3      | 10.8165 |                | 10.9686  | 11.3884 | 12.2578 |
| SiO2       | 69.86   |                | 70.4477  | 72.0553 | 73.2476 |
| K2O        | 1.6305  |                | 1.2546   | 1.9471  | 4.5755  |
| CaO        | 2.4371  |                | 1.1349   | 1.5702  | 0.9848  |
| FeO        | 2.4409  |                | 1.5192   | 1.4419  | 0.6989  |
| P2O5       | 0.0546  |                | 0.0199   | 0.0253  | 0.0038  |
| TiO2       | 0.4165  |                | 0.1826   | 0.1732  | 0.0649  |
| MnO        | 0.0911  |                | 0.088    | 0.0498  | 0.0598  |
| Total      | 90.3088 |                | 89.3854  | 92.3529 | 95.4564 |

| Sample No. | 21.1 1  | 21.1 2 | 21.1 2  | 21.1 2  | 21.1 3      |
|------------|---------|--------|---------|---------|-------------|
| Fe Group   |         | 2      | 2       | 2       | 2           |
| Glass Type | Pumice  | Shard  | Shard   | Shard   | Shard (ves) |
| Na2O       | 3.0716  |        | 3.7977  | 3.4651  | 3.3431      |
| MgO        | 0.2243  |        | 0.1841  | 0.1663  | 0.2166      |
| Al2O3      | 10.6546 |        | 11.9761 | 11.3968 | 10.7547     |
| SiO2       | 70.7079 |        | 72.1539 | 72.2195 | 72.4346     |
| K2O        | 3.0399  |        | 2.1764  | 2.5107  | 2.6668      |
| CaO        | 1.2484  |        | 1.6459  | 1.4983  | 1.3366      |
| FeO        | 1.1244  |        | 1.7399  | 1.7482  | 1.0632      |
| P2O5       | 0.0246  |        | 0.0238  | 0.0186  | 0.0149      |
| TiO2       | 0.1877  |        | 0.1644  | 0.1429  | 0.1947      |
| MnO        | 0.0891  |        | 0.1109  | 0.1315  | 0.0942      |
| Total      | 90.3726 |        | 93.973  | 93.2978 | 92.1194     |

| Sample No. | 21.1 3      | 21.1 3      | 21.1 3      | 21.1 3      | 21.1 3      |
|------------|-------------|-------------|-------------|-------------|-------------|
| Fe Group   |             | 3           | 3           | 3           | 3           |
| Glass Type | Shard (ves) |
| Na2O       | 3.4087      |             | 1.7694      | 3.5088      | 3.4419      |
| MgO        | 0.5614      |             | 1.3812      | 0.6149      | 0.8537      |

|       |         |         |         |         |         |
|-------|---------|---------|---------|---------|---------|
| Al2O3 | 11.5777 | 12.2894 | 11.0461 | 11.6574 | 10.0659 |
| SiO2  | 71.1106 | 60.8273 | 70.2516 | 66.4871 | 71.3697 |
| K2O   | 1.8356  | 1.1535  | 1.6333  | 1.2143  | 1.866   |
| CaO   | 2.1498  | 4.4931  | 2.4624  | 3.6825  | 2.1719  |
| FeO   | 2.4188  | 6.0706  | 2.6903  | 3.8443  | 2.2355  |
| P2O5  | 0.0586  | 0.1015  | 0.0936  | 0.0804  | 0.0607  |
| TiO2  | 0.538   | 0.8225  | 0.5646  | 0.6515  | 0.4652  |
| MnO   | 0.0692  | 0.1223  | 0.076   | 0.0728  | 0.0466  |
| Total | 93.7284 | 89.0309 | 92.9415 | 91.9858 | 90.987  |

|            |          |          |          |           |          |
|------------|----------|----------|----------|-----------|----------|
| Sample No. | 21.2 H 1 | 21.2 I 1 | 21.2 J 3 | 21.2 J 4  | 21.2 K 1 |
| Fe Group   | 2        | 2        | 2        | 2         | 2        |
| Glass Type | Perlite  | Perlite  | Perlite  | Microlite | Pumice   |
| Na2O       | 3.6706   | 4.1258   | 4.0003   | 3.8797    | 2.4606   |
| MgO        | 0.222    | 0.3112   | 0.0982   | 0.104     | 0.1777   |
| Al2O3      | 11.9154  | 11.7974  | 11.9696  | 11.4354   | 10.9999  |
| SiO2       | 73.066   | 72.9117  | 75.5287  | 73.0189   | 70.0437  |
| K2O        | 2.5191   | 1.8167   | 1.9112   | 2.649     | 3.999    |
| CaO        | 1.6831   | 1.7214   | 1.7398   | 1.2469    | 1.5158   |
| FeO        | 1.4911   | 1.3625   | 1.3778   | 1.226     | 1.2457   |
| P2O5       | 0.0203   | 0.019    | 0.0211   | 0.0227    | 0.0153   |
| TiO2       | 0.1849   | 0.173    | 0.1816   | 0.2008    | 0.1747   |
| MnO        | 0.1052   | 0.0843   | 0.0495   | 0.0383    | 0.0948   |
| Total      | 94.8777  | 94.3228  | 96.8779  | 93.8217   | 90.7273  |

|            |          |          |          |          |          |
|------------|----------|----------|----------|----------|----------|
| Sample No. | 21.2 C 4 | 21.2 F 2 | 21.2 H 2 | 21.2 J 1 | 21.2 J 2 |
| Fe Group   | 3        | 3        | 3        | 3        | 3        |
| Glass Type | Perlite  | Pumice   | Perlite  | Yellow   | Yellow   |
| Na2O       | 3.6727   | 3.9058   | 3.6749   | 4.0437   | 3.3054   |
| MgO        | 0.5307   | 0.5149   | 0.3834   | 2.2326   | 3.3965   |
| Al2O3      | 10.6703  | 12.6902  | 11.1549  | 19.5442  | 13.4809  |
| SiO2       | 72.1441  | 70.1667  | 71.9783  | 54.1496  | 54.0223  |
| K2O        | 1.8014   | 0.7134   | 1.8277   | 0.8277   | 1.3271   |
| CaO        | 2.5529   | 3.3547   | 2.1123   | 8.6596   | 7.6384   |
| FeO        | 3.1724   | 2.8472   | 2.8567   | 7.3081   | 13.1206  |
| P2O5       | 0.0852   | 0.051    | 0.065    | 0.1802   | 0.2111   |
| TiO2       | 0.5024   | 0.2919   | 0.4966   | 1.0675   | 1.5987   |
| MnO        | 0.088    | 0.1124   | 0.1048   | 0.2129   | 0.3022   |
| Total      | 95.2201  | 94.6482  | 100.4225 | 98.2259  | 98.4031  |

|            |         |             |             |             |             |
|------------|---------|-------------|-------------|-------------|-------------|
| Sample No. | 23A.1 1 | 23A.1 2     | 23A.1 2     | 23A.1 2     | 23A.1 2     |
| Fe Group   | 2       | 2           | 2           | 2           | 2           |
| Glass Type | Shard   | Shard (ves) | Shard (ves) | Shard (ves) | Shard (ves) |
| Na2O       | 3.63    | 4.042       | 3.1591      | 2.6615      | 3.1629      |
| MgO        | 0.1876  | 0.237       | 0.1832      | 0.1869      | 0.1789      |
| Al2O3      | 11.7679 | 11.9071     | 12.8007     | 10.6853     | 11.5837     |
| SiO2       | 72.3318 | 74.2895     | 70.5768     | 71.1495     | 71.8276     |
| K2O        | 2.1513  | 1.9628      | 2.5793      | 2.8625      | 2.9081      |
| CaO        | 1.6121  | 1.578       | 1.5217      | 1.4909      | 1.5643      |
| FeO        | 1.2414  | 1.2048      | 1.6684      | 1.2877      | 1.5089      |
| P2O5       | 0.0293  | 0.02        | 0.026       | 0.0245      | 0.0161      |
| TiO2       | 0.1601  | 0.147       | 0.2166      | 0.1412      | 0.1469      |

|       |        |          |         |         |          |
|-------|--------|----------|---------|---------|----------|
| MnO   | 0.0967 | 0.0836   | 0.0599  | 0.0988  | 0.1152   |
| Total | 99.123 | 100.9752 | 99.4718 | 97.8046 | 100.3932 |

|            |             |          |         |         |         |
|------------|-------------|----------|---------|---------|---------|
| Sample No. | 23A.1 2     | 23A.1 3  | 23A.1 3 | 23A.1 3 | 23A.1 3 |
| Fe Group   | 2           | 2        | 2       | 2       | 2       |
| Glass Type | Shard (ves) | Pumice   | Pumice  | Pumice  | Pumice  |
| Na2O       | 3.5042      | 3.5352   | 2.9569  | 3.4659  | 2.9169  |
| MgO        | 0.1084      | 0.2806   | 0.2033  | 0.269   | 0.2332  |
| Al2O3      | 11.1648     | 10.882   | 10.9951 | 11.525  | 12.1399 |
| SiO2       | 72.4791     | 73.2323  | 71.2268 | 72.5765 | 72.3176 |
| K2O        | 2.6991      | 2.4243   | 2.8657  | 2.1791  | 3.327   |
| CaO        | 1.495       | 1.6992   | 1.6205  | 2.0428  | 1.7453  |
| FeO        | 1.5001      | 1.3363   | 1.46    | 1.086   | 1.554   |
| P2O5       | 0.0198      | 0.0295   | 0.0241  | 0.027   | 0.0275  |
| TiO2       | 0.149       | 0.2084   | 0.146   | 0.168   | 0.1878  |
| MnO        | 0.0174      | 0.0608   | 0.0944  | 0.1119  | 0.0723  |
| Total      | 100.0303    | 100.2362 | 98.9447 | 99.8521 | 94.5214 |

|            |         |         |         |         |         |
|------------|---------|---------|---------|---------|---------|
| Sample No. | 23A.1 4 | 23A.1 6 | 23A.1 5 | 23A.1 5 | 23A.1 5 |
| Fe Group   | 2       | 2       | 3       | 3       | 3       |
| Glass Type | Perlite | Other   | Other   | Other   | Other   |
| Na2O       | 3.4757  | 4.2259  | 2.4325  | 3.7283  | 2.6966  |
| MgO        | 0.1202  | 0.1225  | 1.0325  | 0.3228  | 4.0862  |
| Al2O3      | 11.1597 | 12.1129 | 14.9208 | 11.5221 | 13.5899 |
| SiO2       | 73.5773 | 72.9076 | 61.2055 | 72.1606 | 57.2609 |
| K2O        | 3.0617  | 1.8053  | 1.1085  | 1.4432  | 0.2769  |
| CaO        | 1.3694  | 1.5469  | 6.1537  | 2.6945  | 8.8331  |
| FeO        | 1.1279  | 1.4268  | 6.789   | 3.3316  | 10.896  |
| P2O5       | 0.0234  | 0.0218  | 0.0997  | 0.1257  | 0.1     |
| TiO2       | 0.192   | 0.1599  | 0.9422  | 0.6142  | 1.2547  |
| MnO        | 0.0683  | 0.0929  | 0.1547  | 0.136   | 0.2054  |
| Total      | 94.1756 | 94.4224 | 94.8391 | 96.0788 | 99.1996 |

| 4.2 2       | 4.2 3       | 4.2 3       |
|-------------|-------------|-------------|
| 1           | 1           | 1           |
| Shard (ves) | Shard (ves) | Shard (ves) |
| 3.9669      | 3.633       | 3.3211      |
| 0.0327      | 0.0806      | 0.0063      |
| 12.1148     | 12.5615     | 11.7714     |
| 73.805      | 73.0652     | 72.4996     |
| 3.7708      | 3.5683      | 3.3857      |
| 0.6836      | 0.8409      | 0.9457      |
| 0.7668      | 0.748       | 0.7789      |
| 0.0127      | 0.006       | 0.0051      |
| 0.071       | 0.0662      | 0.0929      |
| 0.0661      | 0.0627      | 0.0222      |
| 95.2904     | 94.6323     | 92.8288     |

| 19.1 2  | 21.1 1  | 21.1 1  |
|---------|---------|---------|
| 1       | 2       | 2       |
| Shard   | Pumice  | Pumice  |
| 3.8401  | 3.3535  | 2.7253  |
| 0.029   | 0.2485  | 0.2886  |
| 11.3938 | 11.2351 | 11.4163 |
| 72.6793 | 72.9325 | 72.1002 |
| 4.0005  | 2.4432  | 2.5272  |
| 0.8525  | 1.915   | 1.7753  |
| 0.6765  | 1.3416  | 1.2677  |
| -0.0014 | 0.0159  | 0.0229  |
| 0.0686  | 0.183   | 0.1768  |
| 0.053   | 0.1025  | 0.052   |
| 93.5919 | 93.7708 | 92.3523 |

| 21.1 3      | 21.1 5  | 21.1 2  |
|-------------|---------|---------|
| 2           | 2       | 3       |
| Shard (ves) | Other   | Shard   |
| 2.8048      | 3.9026  | 1.8972  |
| 0.2927      | 0.2387  | 1.0247  |
| 11.5757     | 11.2147 | 11.0326 |
| 72.1383     | 72.0062 | 64.2816 |
| 2.6529      | 1.8902  | 1.3528  |
| 1.6818      | 1.6723  | 3.7116  |
| 1.5607      | 1.3179  | 5.1956  |
| 0.0339      | 0.0333  | 0.1248  |
| 0.1682      | 0.1972  | 0.7725  |
| 0.0964      | 0.0721  | 0.1377  |
| 93.0053     | 92.5451 | 89.531  |

| 21.2 A 2 | 21.2 A 3 | 21.2 C 3 |
|----------|----------|----------|
| 2        | 2        | 2        |
| Perlite  | Pumice   | Pumice   |
| 4.4379   | 2.7349   | 3.2493   |
| 0.2854   | 0.2566   | 0.1494   |

|         |         |         |
|---------|---------|---------|
| 11.1616 | 11.1589 | 11.66   |
| 73.9847 | 73.3887 | 72.8716 |
| 1.5498  | 2.6094  | 2.6537  |
| 1.6745  | 1.6975  | 1.5081  |
| 1.3372  | 1.4659  | 1.4497  |
| 0.0173  | 0.0246  | 0.0208  |
| 0.1879  | 0.1719  | 0.1441  |
| 0.0814  | 0.0849  | 0.0951  |
| 94.7177 | 93.5933 | 93.8017 |

|          |          |          |
|----------|----------|----------|
| 21.2 A 1 | 21.2 B 1 | 21.2 C 1 |
| 3        | 3        | 3        |
| Perlite  | Perlite  | Pumice   |
| 3.6196   | 4.0064   | 3.4028   |
| 0.6142   | 0.4425   | 0.7009   |
| 11.9098  | 10.9143  | 12.0635  |
| 69.5957  | 70.3457  | 67.7919  |
| 1.652    | 2.001    | 1.4833   |
| 2.6097   | 2.3211   | 3.3766   |
| 3.5293   | 2.6259   | 3.9756   |
| 0.1179   | 0.0768   | 0.1086   |
| 0.5865   | 0.5114   | 0.5579   |
| 0.0846   | 0.0649   | 0.1069   |
| 94.3193  | 93.3101  | 93.568   |

|          |         |          |
|----------|---------|----------|
| 21.2 K 2 | 23A.1 1 | 23A.1 1  |
| 3        | 2       | 2        |
| Yellow   | Shard   | Shard    |
| 2.7527   | 2.9505  | 3.092    |
| 3.3513   | 0.2455  | 0.1622   |
| 15.5981  | 11.0158 | 11.4047  |
| 57.0929  | 71.2035 | 71.8634  |
| 0.7571   | 2.6449  | 3.0088   |
| 8.0147   | 1.6181  | 1.5625   |
| 8.9363   | 1.1147  | 1.3306   |
| 0.0733   | 0.0258  | 0.0106   |
| 0.7502   | 0.1785  | 0.1425   |
| 0.1917   | 0.1101  | 0.0882   |
| 97.5182  | 98.0152 | 100.2454 |

|             |             |             |
|-------------|-------------|-------------|
| 23A.1 2     | 23A.1 2     | 23A.1 2     |
| 2           | 2           | 2           |
| Shard (ves) | Shard (ves) | Shard (ves) |
| 2.9158      | 4.064       | 4.2328      |
| 0.2051      | 0.2378      | 0.2616      |
| 11.5247     | 11.657      | 11.4683     |
| 70.8788     | 74.1675     | 74.2768     |
| 2.8172      | 2.0044      | 1.4656      |
| 1.6788      | 1.5006      | 1.8481      |
| 1.6159      | 1.4561      | 1.2804      |
| 0.0161      | 0.023       | 0.0227      |
| 0.172       | 0.2863      | 0.1992      |

|        |         |         |
|--------|---------|---------|
| 0.0623 | 0.0188  | 0.0686  |
| 99.2   | 100.925 | 99.9031 |

| 23A.1 3 | 23A.1 3 | 23A.1 3 |
|---------|---------|---------|
| 2       | 2       | 2       |
| Pumice  | Pumice  | Pumice  |
| 3.1602  | 2.6248  | 3.1436  |
| 0.2378  | 0.2532  | 0.1598  |
| 11.5932 | 10.692  | 11.3464 |
| 73.7923 | 72.1077 | 71.3946 |
| 2.7307  | 2.9382  | 2.8505  |
| 1.746   | 1.6692  | 1.4838  |
| 1.4048  | 1.0244  | 1.4628  |
| 0.0224  | 0.0292  | 0.0227  |
| 0.1759  | 0.1573  | 0.144   |
| 0.0878  | 0.0481  | 0.1235  |
| 94.9511 | 91.5441 | 92.1316 |

23A.1 6

3

Other

3.4543  
0.833  
12.0008  
68.1898  
1.4659  
3.4455  
4.5578  
0.1134  
0.7027  
0.0855  
94.8486
