# Supplementary material
Source: publisher figshare collection journal article supplement (https://geolsoc.figshare.com/articles/dataset/_/3453215)
Supplement: Supplementary file 6 [file 1]

Summary of the results of XRD analyses.

| Sample No. | Colour    | Smectite Group                   | Kaolinite | Quartz   | Haematite | Calcite  |
|------------|-----------|----------------------------------|-----------|----------|-----------|----------|
| 6A.2       | Grey      | Smectite-Mica<br>Smectite-Illite | Trace     | Moderate | None      | Moderate |
| 6A.3       | Red       | Smectite-Mica<br>Smectite-Illite | Abundant  | Abundant | Trace     | Trace    |
| 6C.10      | Grey      | Smectite-Mica<br>Smectite-Illite | None      | Moderate | None      | None     |
| 14.1       | Grey      | Smectite-Chlorite                | Trace     | Moderate | None      | None     |
| 18.1       | Dark Grey | Bentonite<br>Smectite-Chlorite   | Trace     | Moderate | None      | None     |
| 18.3       | Red       | Bentonite<br>Smectite-Chlorite   | Moderate  | Moderate | Trace     | None     |
| 23.2       | Grey      | Smectite-Mica<br>Smectite-Illite | Trace     | Moderate | None      | None     |
