# Supplementary material
Source: publisher figshare collection journal article supplement (https://geolsoc.figshare.com/articles/dataset/_/3453215)
Supplement: Supplementary file 7 [file 1]

|   | <u>Date</u> | <u>Comment</u> | <u>Na2O</u> | <u>SiO2</u> | <u>K2O</u> | <u>CaO</u> | <u>MgO</u> | <u>FeO</u> |
|---|-------------|----------------|-------------|-------------|------------|------------|------------|------------|
| 1 | 26/02/2012  | 18.5 Hbl 1     | 1.4452      | 47.1679     | 0.1931     | 10.1325    | 13.2815    | 16.4852    |
| 2 | 27/02/2012  | 4.2 Px 3       | 1.3967      | 44.5856     | 1.1002     | 11.4829    | 12.2062    | 15.8729    |
| 3 | 27/02/2012  | 4.2 Px 4       | 1.2842      | 46.0503     | 1.0232     | 11.5114    | 12.8963    | 14.9006    |
| 4 | 27/02/2012  | 19.1 Px 1      | 1.2899      | 45.9937     | 0.9139     | 11.6454    | 12.5607    | 15.5426    |
| 5 | 27/02/2012  | 19.1 Px 3      | 1.6271      | 46.1034     | 0.5864     | 11.2204    | 14.1489    | 13.6256    |
| 6 | 27/02/2012  | 19.1 Px 7      | 1.3099      | 45.9239     | 0.7422     | 11.1351    | 12.2085    | 16.0607    |
| 7 | 26/02/2012  | 21.1 Px 1      | 1.6871      | 46.2802     | 0.2124     | 11.0191    | 14.8513    | 12.6301    |
| 8 | 27/02/2012  | 23A.1 Px 8     | 1.3959      | 47.3529     | 0.0713     | 10.6025    | 12.7912    | 16.452     |

**Note: Hornblendes 2-8 were analysed as pyroxenes as the comment suggests.**

| <u>Al2O3</u> | <u>TiO2</u> | <u>Cr2O3</u> | <u>MnO</u> | <u>NiO</u> | <u>Total</u> | <u>F</u> |
|--------------|-------------|--------------|------------|------------|--------------|----------|
| 6.7702       | 1.31        | 0.0073       | 0.5864     | -0.0065    | 97.5554      | 0.1824   |
| 8.8373       | 1.4402      | 0.0065       | 0.5492     | -0.0036    | 97.4741      |          |
| 8.3085       | 1.3619      | 0.0003       | 0.5169     | 0.0021     | 97.8556      |          |
| 8.2743       | 1.2473      | 0.0035       | 0.569      | -0.0015    | 98.0388      |          |
| 8.8209       | 1.816       | -0.0033      | 0.3126     | -0.003     | 98.255       |          |
| 8.8206       | 0.9969      | 0.0154       | 0.4423     | 0.007      | 97.6626      |          |
| 8.106        | 1.862       | -0.0008      | 0.5753     | -0.0052    | 97.2174      |          |
| 7.2298       | 1.4057      | -0.007       | 0.5826     | -0.0094    | 97.8676      |          |
