# Supplementary material
Source: publisher figshare collection journal article supplement (https://geolsoc.figshare.com/articles/dataset/_/3453215)
Supplement: Supplementary file 8 [file 1]

| Sample No.                     | 4.1       | 6.2       | 18.4      | 23.1      | 4.2       | 18.5      | 19.1      | 21.2      | 21.1      | 23A.1     | 26        |
|--------------------------------|-----------|-----------|-----------|-----------|-----------|-----------|-----------|-----------|-----------|-----------|-----------|
| Rock Type                      | Sandstone | Tuff (KR) |
| SiO <sub>2</sub>               | 44.95     | 36.77     | 56.42     | 63.87     | 59.57     | 56.78     | 61.84     | 62.69     | 60.26     | 63.29     | 73.29     |
| Al <sub>2</sub> O <sub>3</sub> | 10.54     | 8.30      | 14.48     | 17.00     | 13.79     | 15.9      | 13.64     | 16.63     | 18.09     | 16.12     | 12.7      |
| Fe <sub>2</sub> O <sub>3</sub> | 3.48      | 2.88      | 4.06      | 4.03      | 4.79      | 5.25      | 4.72      | 4.28      | 4.96      | 3.95      | 1.37      |
| MgO                            | 1.84      | 1.20      | 2.49      | 1.71      | 2.75      | 3.2       | 1.83      | 1.31      | 2.12      | 1.5       | 0.32      |
| CaO                            | 18.94     | 25.41     | 10.33     | 5.08      | 7.8       | 9.19      | 6.74      | 5.89      | 7.72      | 5.19      | 0.53      |
| Na <sub>2</sub> O              | 1.69      | 1.24      | 2.43      | 2.91      | 2.02      | 2.16      | 2.15      | 2.21      | 2.21      | 2.28      | 2.23      |
| K <sub>2</sub> O               | 1.015     | 0.724     | 0.524     | 0.997     | 1.196     | 0.433     | 1.798     | 1.227     | 0.614     | 1.294     | 6.528     |
| TiO <sub>2</sub>               | 0.359     | 0.269     | 0.459     | 0.512     | 0.498     | 0.529     | 0.459     | 0.543     | 0.621     | 0.466     | 0.068     |
| MnO                            | 0.298     | 0.881     | 0.778     | 0.094     | 0.098     | 0.446     | 0.118     | 0.084     | 0.089     | 0.139     | 0.038     |
| P <sub>2</sub> O <sub>5</sub>  | 0.087     | 0.065     | 0.093     | 0.049     | 0.062     | 0.043     | 0.058     | 0.071     | 0.05      | 0.062     | 0.007     |
| LOI                            | 16.30     | 21.77     | 7.91      | 3.50      | 7.61      | 5.57      | 6.47      | 4.69      | 3.01      | 5.2       | 2.46      |
| Total                          | 99.51     | 99.51     | 99.97     | 99.74     | 100.18    | 99.50     | 99.82     | 99.63     | 99.74     | 99.49     | 99.54     |
| Zn                             | 61.5      | 67.6      | 63.3      | 62.4      | 64.7      | 68.1      | 61.4      | 87.6      | 62.1      | 65.3      | 37.4      |
| Cu                             | 25.2      | 28.5      | 37.5      | 41.3      | 31.5      | 45.1      | 37.1      | 53.2      | 36.7      | 34.8      | 2.1       |
| Ni                             | 22.1      | 21.5      | 14.8      | 16.6      | 27.3      | 17.6      | 25.1      | 19.2      | 13.4      | 16.2      | 2.2       |
| Cr                             | 51.8      | 29.3      | 27.1      | 25.2      | 68        | 29.8      | 52.3      | 39.4      | 30.8      | 23        | -0.8      |
| V                              | 101.4     | 65.7      | 133.7     | 128.1     | 142.1     | 218.4     | 124.1     | 264.2     | 149.9     | 116.1     | 2.9       |
| Ba                             | 238.9     | 285.5     | 135.5     | 170.5     | 212.9     | 120.8     | 306.6     | 151.6     | 225.4     | 314.6     | 781       |
| Sc                             | 10.2      | 5.2       | 23.1      | 28.9      | 21.1      | 37.7      | 20.3      | 44.6      | 31.7      | 27.5      | 2.7       |
| La                             | 23.7      | 8.2       | 9.9       | 6         | 14.8      | 1.6       | 14.8      | 3.6       | 48.1      | 2.5       | 7.4       |
| Ce                             | 31.2      | 16.4      | 20.6      | 17.9      | 29.3      | 9.5       | 29.3      | 15.2      | 77.5      | 13.2      | 19.4      |
| Nd                             | 11.5      | 11.4      | 10.5      | 10.3      | 12.3      | 6.5       | 12.8      | 9.4       | 26.1      | 8.3       | 11.5      |
| U                              | 1.4       | 0.3       | 0.5       | 0.8       | 1.4       | 0         | 1.9       | 0.4       | 4.6       | 0.3       | 0.4       |
| Th                             | 4         | 0.9       | 1.1       | 1.6       | 5.4       | 0.3       | 6         | 1.2       | 22        | 0.6       | 1.7       |
| Pb                             | 9.8       | 4.6       | 5.4       | 6.9       | 13        | 3.9       | 14.2      | 6.2       | 11.8      | 4.5       | 7.1       |
| Nb                             | 4.4       | 1.3       | 1.8       | 2.1       | 5.8       | 1.3       | 5.9       | 1.9       | 18.2      | 1.7       | 2.3       |
| Zr                             | 57.7      | 55.7      | 64.2      | 86.5      | 79.4      | 50.1      | 80.9      | 81.5      | 87.6      | 57.2      | 90.1      |
| Y                              | 25.9      | 24.1      | 31.3      | 18.7      | 20.3      | 20.1      | 20.7      | 25.2      | 26.3      | 18        | 25.9      |
| Sr                             | 217.3     | 158       | 166.2     | 167.2     | 270.1     | 156.8     | 185.6     | 150       | 95.7      | 174.3     | 170.6     |
| Rb                             | 31.6      | 12.6      | 12.3      | 18.6      | 35.5      | 9.8       | 56.6      | 24.1      | 112.9     | 15.2      | 26.4      |
